# Supplementary material for: A Repertoire of Virtual-Reality, Occupational Therapy Exercises for Motor Rehabilitation Based on Action Observation
Source: MDPI journal article supplement (doi:10.3390/data7010009), 2022-01-11
Supplement: s1 [file s1]

Archive with 1 entries (1 files):
- data-1459289-supplementary.pdf
